# Supplementary material
Source: publisher figshare collection journal article supplement (https://sage.figshare.com/ndownloader/files/12968165)
Supplement: Supplementary file 1 [file 12968165]

## Objective Structured Assessment of Technical Skills

|                                        |                                                                                                  |   |                                                                             |   |                                                                                      |
|----------------------------------------|--------------------------------------------------------------------------------------------------|---|-----------------------------------------------------------------------------|---|--------------------------------------------------------------------------------------|
| <b><u>Time and Motion</u></b>          |                                                                                                  |   |                                                                             |   |                                                                                      |
|                                        | 1                                                                                                | 2 | 3                                                                           | 4 | 5                                                                                    |
|                                        | Many unnecessary moves                                                                           |   | Efficient time/motion but some unnecessary moves                            |   | Clear economy of movement and maximum efficiency                                     |
| <b><u>Instrument handling</u></b>      |                                                                                                  |   |                                                                             |   |                                                                                      |
|                                        | 1                                                                                                | 2 | 3                                                                           | 4 | 5                                                                                    |
|                                        | Repeatedly makes tentative or awkward moves with instruments by inappropriate use of instruments |   | Competent use of instruments but occasionally appeared awkward or stiff     |   | Fluid moves with instruments and no awkwardness                                      |
| <b><u>Knowledge of instruments</u></b> |                                                                                                  |   |                                                                             |   |                                                                                      |
|                                        | 1                                                                                                | 2 | 3                                                                           | 4 | 5                                                                                    |
|                                        | Frequently utilized the incorrect instrument or did not know which instrument to use             |   | Knows names of instruments and used appropriate instruments                 |   | Obviously familiar with instruments and their names                                  |
| <b><u>Flow of operation</u></b>        |                                                                                                  |   |                                                                             |   |                                                                                      |
|                                        | 1                                                                                                | 2 | 3                                                                           | 4 | 5                                                                                    |
|                                        | Frequently stopped during operation and seemed unsure of next move                               |   | Demonstrated some forward planning with reasonable progression of procedure |   | Obviously planned course of operation with effortless flow from one move to the next |
| <b><u>Knowledge of procedure</u></b>   |                                                                                                  |   |                                                                             |   |                                                                                      |
|                                        | 1                                                                                                | 2 | 3                                                                           | 4 | 5                                                                                    |
|                                        | Deficient knowledge, needed review of specific instruction at most steps                         |   | Knows all important steps of operation                                      |   | Demonstrated familiarity with all aspects of operation                               |



|                                                                                                      |                       |                      |                  |                   |               |
|------------------------------------------------------------------------------------------------------|-----------------------|----------------------|------------------|-------------------|---------------|
| Resident self assessment - <i>comparable to the physician performance diagnostic inventory scale</i> |                       |                      |                  |                   |               |
|                                                                                                      |                       |                      |                  |                   |               |
| Please evaluate yourself in the below categories using the following scale:                          |                       |                      |                  |                   |               |
|                                                                                                      | Unsatisfactory<br>(1) | Early learner<br>(2) | Competent<br>(3) | Proficient<br>(4) | Expert<br>(5) |
| <b>Following completion of pre-test:</b>                                                             |                       |                      |                  |                   |               |
| Use of burr                                                                                          |                       |                      |                  |                   |               |
| Use of awl                                                                                           |                       |                      |                  |                   |               |
| Use of ball-tip probe                                                                                |                       |                      |                  |                   |               |
| Performance of procedure                                                                             |                       |                      |                  |                   |               |
| Understanding of procedure                                                                           |                       |                      |                  |                   |               |
| Knowledge of anatomy                                                                                 |                       |                      |                  |                   |               |
| Economy of movements/<br>efficiency of procedure                                                     |                       |                      |                  |                   |               |
|                                                                                                      |                       |                      |                  |                   |               |
| <b>Following completion of post-test:</b>                                                            |                       |                      |                  |                   |               |
| Use of burr                                                                                          |                       |                      |                  |                   |               |
| Use of awl                                                                                           |                       |                      |                  |                   |               |
| Use of ball-tip probe                                                                                |                       |                      |                  |                   |               |
| Performance of procedure                                                                             |                       |                      |                  |                   |               |
| Understanding of procedure                                                                           |                       |                      |                  |                   |               |
| Knowledge of anatomy                                                                                 |                       |                      |                  |                   |               |
| Economy of movements/<br>efficiency of procedure                                                     |                       |                      |                  |                   |               |
